# Supplementary material for: Classification of Angle Closure Severity by Hierarchical Cluster Analysis of Ocular Biometrics in the Dark and Light
Source: PubMed Central journal article supplement — Transl Vis Sci Technol. 2023 Sep 6;12(9):4. doi: 10.1167/tvst.12.9.4 (PMC10484011; doi:10.1167/tvst.12.9.4), 2023-09-06

**Supplementary Figure 1:** Dendrogram representation of agglomerative hierarchical cluster analysis of PACD eyes in the dark (left) and light (right).

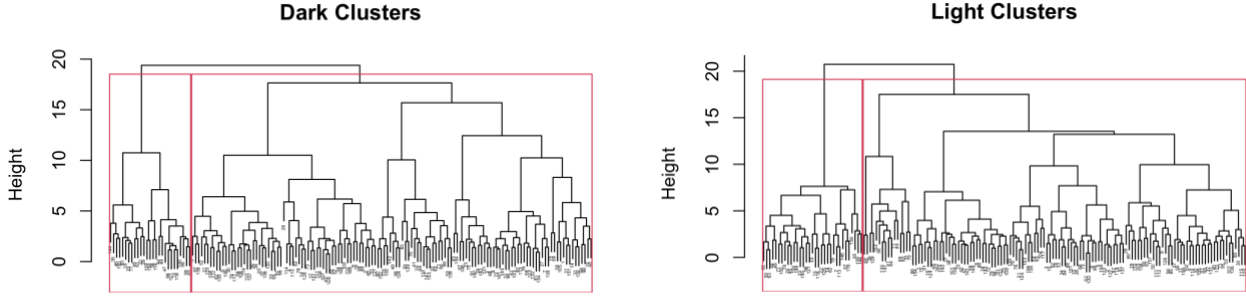

Supplement: tvst-12-9-4_s001.pdf [file tvst-12-9-4_s001.pdf]
