# Supplementary material for: Classification of Angle Closure Severity by Hierarchical Cluster Analysis of Ocular Biometrics in the Dark and Light
Source: PubMed Central journal article supplement — Transl Vis Sci Technol. 2023 Sep 6;12(9):4. doi: 10.1167/tvst.12.9.4 (PMC10484011; doi:10.1167/tvst.12.9.4), 2023-09-06
Supplement: tvst-12-9-4_s002.pdf [file tvst-12-9-4_s002.pdf]

**Supplementary Table 1.** Comparison of demographics and ocular biometric factors between Clusters 1A, 1B, and 2 from the 3-cluster sensitivity analysis

| Lighting | Mean Parameters<br>(Mean ± SD) | Cluster 1      | Cluster 2      | Cluster 3      | P-value <sup>a</sup> | 1 v 2 <sup>a</sup> | 1 v 3 <sup>a</sup> | 2 v 3 <sup>a</sup> |
|----------|--------------------------------|----------------|----------------|----------------|----------------------|--------------------|--------------------|--------------------|
| Dark     |                                | N = 71         | N = 61         | N = 27         |                      |                    |                    |                    |
|          | PAC/G:PACS                     | 23:48          | 13:48          | 3:24           | 0.07                 |                    |                    |                    |
|          | IOP <sup>b</sup> (mmHg)        | 16.638 ± 4.019 | 16.054 ± 3.085 | 15.321 ± 2.688 | 0.23                 | > 0.99             | 0.29               | > 0.99             |
|          | AOD750 (mm)                    | 0.132 ± 0.044  | 0.185 ± 0.044  | 0.225 ± 0.055  | < <b>0.001</b>       | < <b>0.001</b>     | < <b>0.001</b>     | <b>0.01</b>        |
|          | TISA750 (mm <sup>2</sup> )     | 0.066 ± 0.024  | 0.113 ± 0.027  | 0.114 ± 0.024  | < <b>0.001</b>       | < <b>0.001</b>     | < <b>0.001</b>     | 0.1                |
|          | IA (mm <sup>2</sup> )          | 1.650 ± 0.249  | 1.567 ± 0.153  | 1.554 ± 0.213  | 0.10                 | 0.11               | 0.12               | > 0.99             |
|          | IT750 (mm)                     | 0.426 ± 0.085  | 0.366 ± 0.059  | 0.425 ± 0.052  | < <b>0.001</b>       | < <b>0.001</b>     | > 0.99             | < <b>0.001</b>     |
|          | IC (mm)                        | 0.270 ± 0.056  | 0.330 ± 0.047  | 0.206 ± 0.060  | < <b>0.001</b>       | < <b>0.001</b>     | < <b>0.001</b>     | < <b>0.001</b>     |
|          | ACD (mm)                       | 2.160 ± 0.212  | 2.109 ± 0.170  | 2.420 ± 0.184  | < <b>0.001</b>       | 0.39               | < <b>0.001</b>     | < <b>0.001</b>     |
|          | LV (mm)                        | 0.800 ± 0.168  | 0.882 ± 0.130  | 0.573 ± 0.136  | < <b>0.001</b>       | <b>0.006</b>       | > 0.99             | < <b>0.001</b>     |
|          | ACW (mm)                       | 11.524 ± 0.456 | 11.492 ± 0.307 | 11.454 ± 0.281 | 0.70                 | > 0.99             | > 0.99             | > 0.99             |
|          | PD (mm)                        | 3.848 ± 0.722  | 3.463 ± 0.503  | 4.259 ± 0.880  | < <b>0.001</b>       | <b>0.001</b>       | 0.13               | < <b>0.001</b>     |
| Light    |                                | N = 16         | N = 110        | N = 33         |                      |                    |                    |                    |
|          | PAC/G:PACS                     | 8:8            | 28:82          | 3:30           | <b>0.01</b>          |                    |                    |                    |
|          | IOP <sup>b</sup> (mmHg)        | 18.312 ± 5.591 | 16.015 ± 3.088 | 15.747 ± 3.236 | <b>0.03</b>          | < <b>0.001</b>     | < <b>0.001</b>     | > 0.99             |
|          | AOD750 (mm)                    | 0.169 ± 0.061  | 0.225 ± 0.050  | 0.311 ± 0.047  | < <b>0.001</b>       | < <b>0.001</b>     | < <b>0.001</b>     | < <b>0.001</b>     |
|          | TISA750 (mm <sup>2</sup> )     | 0.084 ± 0.034  | 0.132 ± 0.030  | 0.164 ± 0.026  | < <b>0.001</b>       | < <b>0.001</b>     | < <b>0.001</b>     | < <b>0.001</b>     |
|          | IA (mm <sup>2</sup> )          | 1.551 ± 0.187  | 1.848 ± 0.200  | 1.888 ± 0.218  | < <b>0.001</b>       | < <b>0.001</b>     | < <b>0.001</b>     | 0.99               |
|          | IT750 (mm)                     | 0.378 ± 0.051  | 0.333 ± 0.065  | 0.332 ± 0.046  | <b>0.01</b>          | <b>0.003</b>       | <b>0.009</b>       | > 0.99             |
|          | IC (mm)                        | 0.212 ± 0.081  | 0.314 ± 0.065  | 0.256 ± 0.056  | < <b>0.001</b>       | < <b>0.001</b>     | 0.22               | < <b>0.001</b>     |
|          | ACD (mm)                       | 1.977 ± 0.240  | 2.119 ± 0.147  | 2.464 ± 0.142  | < <b>0.001</b>       | <b>0.003</b>       | < <b>0.001</b>     | < <b>0.001</b>     |
|          | LV (mm)                        | 0.898 ± 0.200  | 0.862 ± 0.152  | 0.656 ± 0.124  | < <b>0.001</b>       | > <b>0.99</b>      | < <b>0.001</b>     | < <b>0.001</b>     |
|          | ACW (mm)                       | 11.235 ± 0.550 | 11.520 ± 0.331 | 11.685 ± 0.362 | < <b>0.001</b>       | <b>0.01</b>        | < <b>0.001</b>     | 0.07               |
|          | PD (mm)                        | 3.398 ± 0.893  | 2.431 ± 0.416  | 2.567 ± 0.351  | < <b>0.001</b>       | < <b>0.001</b>     | <b>0.003</b>       | 0.11               |

ACD: Anterior chamber depth; ACW: Anterior chamber width; AOD: Angle opening distance; IA: Iris area; IC: Iris curvature; IOP: Intraocular pressure; IT: Iris thickness; LV: Lens vault; PAC: Primary angle closure; PACS: Primary angle closure suspect; PACG: Primary angle closure glaucoma; PD: Pupillary diameter; TISA: Trabecular iris surface area

<sup>a</sup> Statistical significance tested by ANOVA/Pairwise t-test or Kruskal-Wallis/Dunn test or Chi-Squared test

<sup>b</sup> Post hoc; not included in cluster analysis
